# Supplementary material for: An In Silico Study for Expanding the Utility of Cannabidiol in Alzheimer’s Disease Therapeutic Development
Source: MDPI journal article supplement (doi:10.3390/ijms242116013), 2023-11-06
Supplement: s1 [file s1]

## Supplementary information

### *An in silico study for expanding the utility of cannabidiol in Alzheimer's disease therapeutic development*

**Table S1.** Binding affinity with known CBD targets and CBD.

| Uniprot ID | Target name   | Binding affinity ( $pIC_{50}$ ) |
|------------|---------------|---------------------------------|
| Q96F85     | CB1           | 7.64                            |
| P34972     | CB2           | 5.17                            |
| P46089     | GPR3          | 6.35                            |
| Q9Y2T6     | GPR55         | 5.51                            |
| P46095     | GPR6          | 6.32                            |
| Q8NER1     | TRPV1         | 7.26                            |
| Q07869     | PPAR $\alpha$ | 6.08                            |
| Q03181     | PPAR $\beta$  | 6.49                            |
| P37231     | PPAR $\gamma$ | 6.68                            |

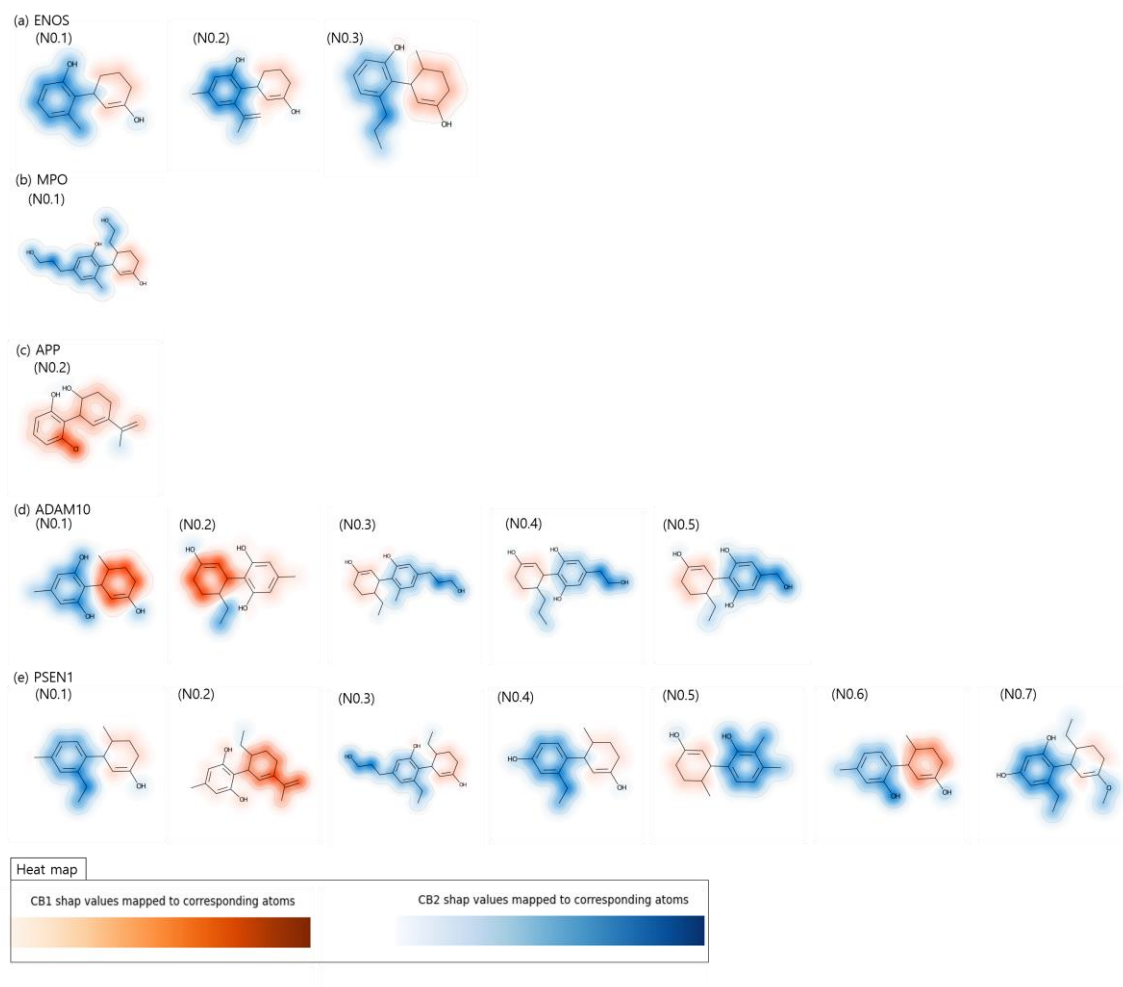

**Figure S1.** 2D structure of CBD analogs with the SHAP analysis indicating the essential substructures for CB1 and CB2. In the heat map, orange and blue colors indicate significant substructures for interacting CB1 or CB2 ligands, respectively. No.1 molecule for APOE, NO.1 and No.3 molecules for APP are non-selective ligands for CB1 and CB2, so these molecules did not analyze SHAP.

**Table S2.** Docking parameters for each potential target.

| Target name (PDB ID) | Coordinates (x, y, z)     | Grid box size (x, y, z) |
|----------------------|---------------------------|-------------------------|
| ENOS (3NOS)          | 9.962, 11.135, 49.762     | 58, 70, 88              |
| MPO (1DNW)           | 28.176, 9.341, 45.441     | 70, 66, 64              |
| APOE (1B68)          | -4.455, 11.313, 21.306    | 34, 60, 40              |
| APP (1AAP)           | 14.722, 16.068, 33.687    | 38, 40, 62              |
| ADAM10 (6BE6)        | 39.75, 64.801, 18.497     | 46, 42, 50              |
| PSEN1 (5A63)         | 126.264, 107.697, 122.218 | 60, 80, 64              |

(a) ENOS

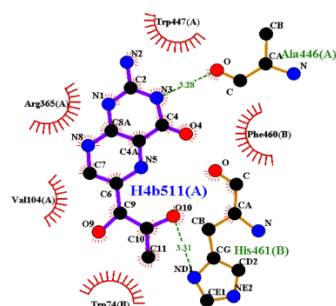

Docking score: -7.0

(b) MPO

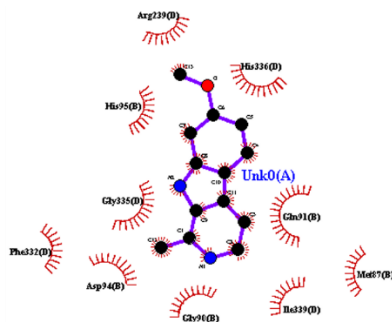

Docking score: -7.3

(c) APOE

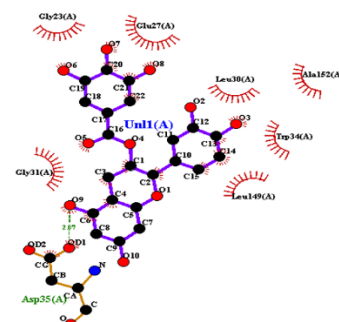

Docking score: -6.6

(d) APP

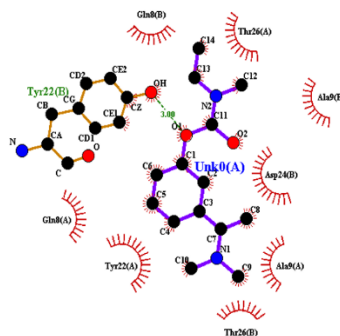

Docking score: -5.5

(e) ADAM10

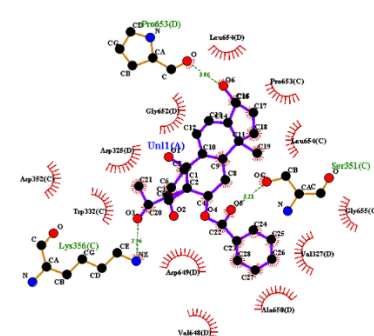

Docking score: -9.0

(f) PSEN1

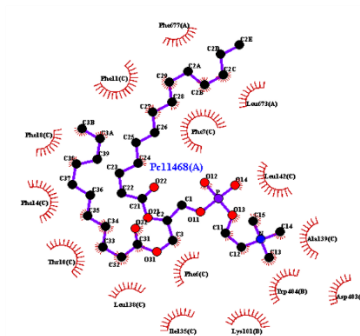

Docking score: -4.5

**Figure S2.** Docking validation. Re-docking of identified potential targets with existing compounds. Existing compound retrieved in PDB and related papers.

**Table S3.** Comparing between active residues based on source and from re-docking.

| Target name<br>(PDB ID) | Compound name                          | Known active residues based on source                                                                                                                             | Maintained residues from re-docking                                      | Source |
|-------------------------|----------------------------------------|-------------------------------------------------------------------------------------------------------------------------------------------------------------------|--------------------------------------------------------------------------|--------|
| ENOS (3NOS)             | Sapropterin                            | hydrogen bond: Trp447, Ala446<br>hydrophobic interaction: Arg365, Phe460, Ser102, Glu463, Trp445                                                                  | hydrogen bond: Ala446<br>hydrophobic interaction: Trp447, Arg365, Phe460 | PDB    |
| MPO (1DNW)              | Harmine                                | hydrophobic interaction: Gln91, Glu102, His95                                                                                                                     | hydrophobic interaction: Gln91, His95                                    | [1]    |
| APOE (1B68)             | Epicatechin Gallate                    | MPO's active residue: Trp34, Leu148, Leu149, Trp26, Leu30, Ala152<br>hydrogen bond: Gln156, Asp35<br>hydrophobic interaction: Leu28, Glu27, Trp26, Asp153, Leu159 | hydrogen bond: ASP35<br>hydrophobic interactions: Glu27, Ala152, Trp26   | [2,3]  |
| APP (1AAP)              | rivastigmine                           | Active residue: Ser6, Glu7, Gln8, Tyr22, Phe23, Asp24, Val25                                                                                                      | hydrogen bond: Trp22<br>hydrophobic interactions: Gln8, Tyr22, Asp24     | [4]    |
| ADAM10 (6BE6)           | Calotropone                            | hydrogen bond: Asp651<br>hydrophobic interaction: Val333, Leu654(c), Leu654(d), Pro392, His393, Gln439, Ser395, Pro392                                            | hydrophobic interaction: Leu654(c), and Leu654(d)                        | [5]    |
| PSEN1 (5A63)            | 1,2-Diacyl-sn-glycero-3-phosphocholine | hydrogen bond: Lys101<br>hydrophobic interaction: Leu142, Phe6, Trp404, Ile408, Val131, Val393, Phe411, Val94, Ala98, Val97, Ile135, Ala139                       | hydrophobic interaction: Phe6, Trp404, Ile135, Ala139.                   | PDB    |

## Reference

- [1] Bensalem, Sihem, et al. "Inhibition of myeloperoxidase activity by the alkaloids of Peganum harmala L.(Zygophyllaceae)." *Journal of ethnopharmacology* 154.2 (2014): 361-369.
- [2] Petros, Andrew M., et al. "Fragment-based discovery of an apolipoprotein E4 (apoE4) stabilizer." *Journal of Medicinal Chemistry* 62.8 (2019): 4120-4130.
- [3] Bano, Saddia, et al. "In Silico Identification of Novel Apolipoprotein E4 Inhibitor for Alzheimer's Disease Therapy." *Current Computer-Aided Drug Design* 15.1 (2019): 97-103.
- [4] Rahman, Md Saidur, et al. "In vivo neuropharmacological potential of gomphandra tetrandra (wall.) sleumer and in-silico study against  $\beta$ -amyloid precursor protein." *Processes* 9.8 (2021): 1449.
- [5] Purnama, Agnia, et al. "Molecular docking investigation of calotropone as a potential natural therapeutic agent against pancreatic cancer." *Journal of Advanced Pharmaceutical Technology & Research* 13.1 (2022): 44.
